# Supplementary material for: Mechanistic and therapeutic distinctions between cardiosphere-derived cell and mesenchymal stem cell extracellular vesicle non-coding RNA
Source: PubMed Central journal article supplement (PMC8060398; doi:10.1038/s41598-021-87939-9), 2021-04-21
Supplement: 41598_2021_87939_MOESM1_ESM.pdf [file 41598_2021_87939_MOESM1_ESM.pdf]

# Supplementary Figures

## **Mechanistic and therapeutic distinctions between cardiosphere-derived cell and mesenchymal stem cell extracellular vesicle non-coding RNA**

Ann-Sophie Walravens<sup>1</sup>, Sasha Smolgovsky<sup>1</sup>, Liang Li<sup>1</sup>, Lauren Kelly<sup>1</sup>, Travis Antes<sup>1</sup>, Kiel Peck<sup>1</sup>, Tanner Quon<sup>1</sup>, Ahmed Ibrahim<sup>2</sup>, Eduardo Marbán<sup>2</sup>, Benjamin Berman<sup>3</sup>, Linda Marbán<sup>1\*</sup>, Luis R.-Borlado<sup>1</sup>, Geoffrey de Couto<sup>1,2\*</sup>

<sup>1</sup> Capricor Therapeutics, Inc., Beverly Hills, CA 90211, USA.

<sup>2</sup> Smidt Heart Institute, Cedars-Sinai Medical Center, Los Angeles, CA 90048, USA.

<sup>3</sup> Center for Bioinformatics and Functional Genomics, Cedars-Sinai Medical Center, Los Angeles, CA 90048, USA

# Supplemental Figure 1

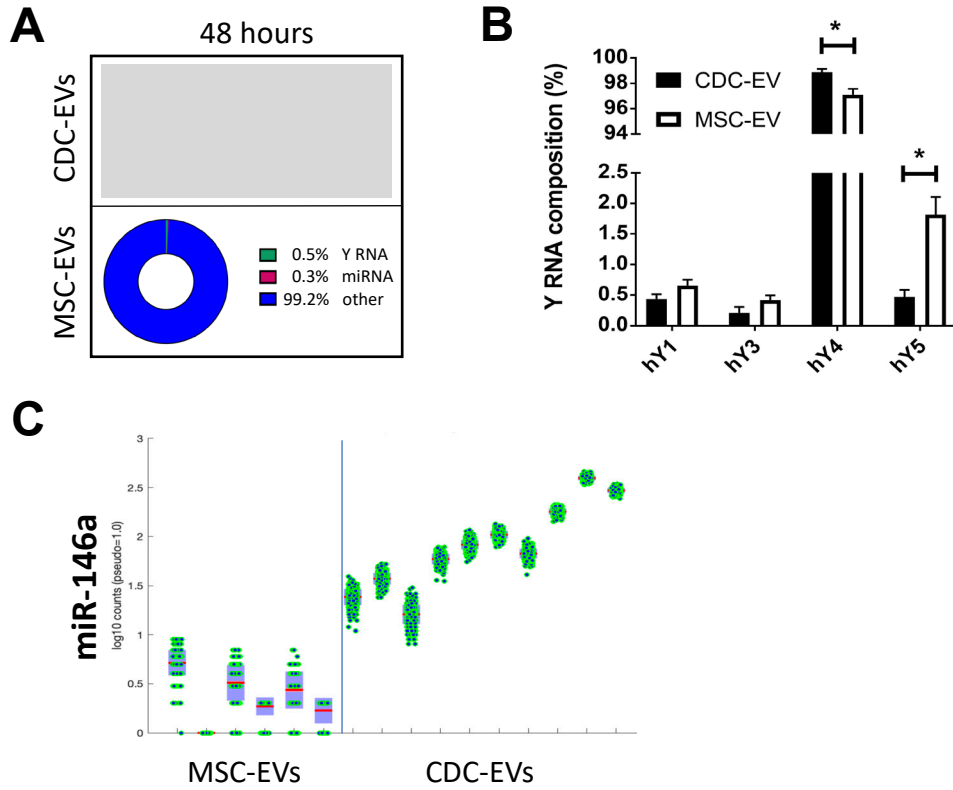

**Supplemental Figure 1. ncRNA composition in EVs.** **A**, Relative proportion of Y RNA fragments with sequence homology to its parent Y RNA. **B**, Number of miR-146a reads in MSC-EVs and CDC-EVs. \* $P < 0.05$ .

## Supplemental Figure 2

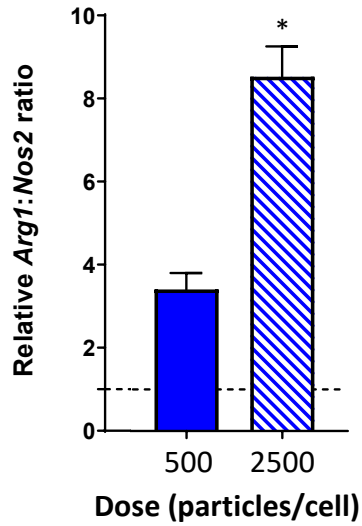

**Supplemental Figure 2. Dose-dependent relative gene expression of Arg1 and Nos2 following CDC-EV treatment.** Two EV doses were tested: 500 and 2500 particles/cell. Untreated control macrophages are depicted by the dashed line. \*P<0.05
